# Supplementary material
Source: Springer Nature journal article supplement (https://www.springermedizin.de/resource/supplementary/13030_2014_151_MOESM3_ESM.pdf/9644852)

## Social activity: This person would be invited to...

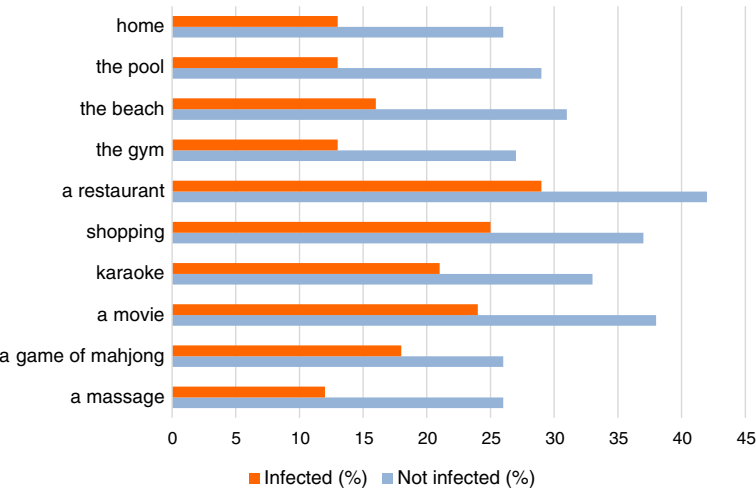

Supplement: MOESM3 [file 9644852]
